# Supplementary material
Source: PubMed Central journal article supplement (PMC3755642)
Supplement: supp_kwt031_kwt031_Web_Material.pdf [file supp_kwt031_kwt031_Web_Material.pdf]

Web Table 1. The International Classification of Diseases, Version 9 (ICD-9) Codes Used to Identify the Exposure and Outcomes in the Consortium on Safe Labor, 2002-2008

| <b>Definition in the current study</b> | <b>Collected ICD-9 codes</b> | <b>Definition</b>                                                                                                                              |
|----------------------------------------|------------------------------|------------------------------------------------------------------------------------------------------------------------------------------------|
| <b>Thyroid diseases</b>                |                              |                                                                                                                                                |
| Primary hypothyroidism                 | 244                          | Acquired hypothyroidism                                                                                                                        |
|                                        | 244.8                        | Other specified acquired hypothyroidism                                                                                                        |
|                                        | 244.9                        | Unspecified hypothyroidism                                                                                                                     |
| Iatrogenic hypothyroidism              | 244                          | Postsurgical hypothyroidism                                                                                                                    |
|                                        | 244.1                        | Other postablative hypothyroidism                                                                                                              |
|                                        | 244.2                        | Iodine hypothyroidism                                                                                                                          |
|                                        | 244.3                        | Other iatrogenic hypothyroidism                                                                                                                |
|                                        | 243                          | Congenital hypothyroidism                                                                                                                      |
| Hyperthyroidism                        | 242-242.9                    | Thyrotoxicosis with or without goiter                                                                                                          |
| Other or unspecific thyroid diseases   | 193                          | Malignant neoplasm of thyroid gland                                                                                                            |
|                                        | 226                          | Benign neoplasm of thyroid glands                                                                                                              |
|                                        | 240-240.9                    | Simple and unspecified goiter                                                                                                                  |
|                                        | 241-241.9                    | Nontoxic nodular goiter                                                                                                                        |
|                                        | 245-245.9                    | Thyroiditis                                                                                                                                    |
|                                        | 246-246.9                    | Other disorders of thyroid                                                                                                                     |
|                                        | 648.1                        | Other current conditions in the mothers classifiable elsewhere but complicating pregnancy, childbirth, or the puerperium - thyroid dysfunction |
| <b>Other chronic diseases</b>          |                              |                                                                                                                                                |
| Asthma                                 | 493-493.9                    | Asthma                                                                                                                                         |

|               |           |                                                                                                      |
|---------------|-----------|------------------------------------------------------------------------------------------------------|
| Diabetes      | 250-250.9 | Diabetes mellitus                                                                                    |
|               |           | Other current conditions in the mothers                                                              |
|               | 648       | classifiable elsewhere but complicating pregnancy, childbirth, or the puerperium - diabetes mellitus |
| Hypertension  | 401       | Essential hypertension                                                                               |
|               | 402       | Hypertensive heart disease                                                                           |
|               | 403       | Hypertensive renal disease                                                                           |
|               | 404       | Hypertensive heart and renal disease                                                                 |
|               | 405       | Secondary hypertension                                                                               |
|               | 642       | Benign essential hypertension complicating pregnancy, childbirth, and the puerperium                 |
|               |           | Hypertension secondary to renal disease                                                              |
|               | 642.1     | complicating pregnancy childbirth and the puerperium                                                 |
|               | 642.2     | Other pre-existing hypertension complicating pregnancy, childbirth, and the puerperium               |
| Heart disease | 393       | Chronic rheumatic pericarditis                                                                       |
|               | 394       | Diseases of the mitral valve                                                                         |
|               | 395       | Diseases of the aortic valve                                                                         |
|               | 396       | Diseases of mitral and aortic valve                                                                  |
|               | 397       | Diseases of other endocardial structures                                                             |
|               | 398       | Other rheumatic heart disease                                                                        |
|               | 410       | Acute myocardial infarction                                                                          |
|               | 411       | Other acute and subacute forms of ischemic heart disease                                             |
|               | 412       | Old myocardial infarction                                                                            |

|                               |       |                                                                         |
|-------------------------------|-------|-------------------------------------------------------------------------|
|                               | 413   | Angina pectoris                                                         |
|                               | 414   | Other forms of chronic ischemic heart disease                           |
|                               | 423   | Other diseases of pericardium                                           |
|                               | 424   | Other diseases of endocardium                                           |
|                               | 425   | Cardiomyopathy                                                          |
|                               | 426   | Conduction disorders                                                    |
|                               | 427   | Cardiac dysrhythmias                                                    |
|                               | 428   | Heart failure                                                           |
|                               | 429   | Ill-defined descriptions and complications of heart disease             |
| Gastrointestinal disease      | 555   | Regional enteritis                                                      |
|                               | 556   | Idiopathic proctocolitis                                                |
|                               | 557   | Vascular insufficiency of intestine                                     |
|                               | 558   | Other noninfectious gastroenteritis and colitis                         |
| Kidney disease                | 585   | Chronic renal failure                                                   |
|                               | 586   | Renal failure, unspecified                                              |
|                               | 588   | Disorders resulting from impaired renal function                        |
|                               | 646.2 | Unspecified renal disease in pregnancy, without mention of hypertension |
| Depression                    | 311   | Depressive disorder, not elsewhere classified                           |
|                               | 296.2 | Major depressive disorder, single episode                               |
|                               | 296.3 | Major depressive disorder, recurrent episode                            |
| <b>Outcomes</b>               |       |                                                                         |
| Intrauterine fetal death      | 656.4 | Intrauterine fetal death                                                |
| Respiratory distress syndrome | 769   | Respiratory distress syndrome                                           |
| Intracerebral hemorrhage      | 767.0 | Subdural and cerebral hemorrhage                                        |

|                                         |               |                                                 |
|-----------------------------------------|---------------|-------------------------------------------------|
|                                         | 772.2         | Subarachnoid hemorrhage                         |
| Seizure                                 | 779.0         | Convulsions in the newborn                      |
|                                         | 780.32        | Complex febrile convulsions                     |
|                                         | 780.39        | Other convulsions                               |
| Oliguria                                | 788.5         | Oliguria and anuria                             |
| Cardiomyopathy                          | 425           | Cardiomyopathy                                  |
| Peri- or intraventricular<br>hemorrhage | 772.10-772.14 | Intraventricular hemorrhage of fetus or newborn |
| Necrotizing enterocolitis               | 777.5         | Necrotizing enterocolitis in newborn            |
| Retinopathy of prematurity              | 362.21        | Retinopathy of prematurity                      |
| Sepsis                                  | 771.81        | Septicemia [sepsis] of newborn                  |
|                                         | 038           | Septicemia                                      |
|                                         | 995.91        | Sepsis                                          |
|                                         | 995.92        | Severe sepsis                                   |
| Transient tachypnea                     | 770.6         | Transitory tachypnea of newborn                 |
| Anemia                                  | 776.5         | Congenital anemia                               |
|                                         | 776.6         | Anemia of prematurity                           |
| Apnea                                   | 770.81        | Primary apnea of newborn                        |
|                                         | 770.82        | Other apnea of newborn                          |
|                                         | 786.03        | Apnea                                           |
| Asphyxia                                | 768.5         | Severe birth asphyxia                           |
|                                         | 768.6         | Mild or moderate birth asphyxia                 |
|                                         | 768.9         | Unspecified asphyxia in liveborn infant         |
| Infectious pneumonia                    | 480           | Viral pneumonia                                 |
|                                         | 481           | Pneumococcal pneumonia                          |
|                                         | 482           | Other bacterial pneumonia                       |

|                          |        |                                                                       |
|--------------------------|--------|-----------------------------------------------------------------------|
|                          | 483    | Pneumonia due to other specified organism                             |
|                          | 484    | Pneumonia in infectious diseases classified elsewhere                 |
|                          | 485    | Bronchopneumonia, organism unspecified                                |
|                          | 486    | Pneumonia, organism unspecified                                       |
|                          | 487.0  | Influenza with pneumonia                                              |
|                          | 770.0  | Congenital pneumonia                                                  |
| Aspiration               | 770.1  | Fetal and newborn aspiration                                          |
|                          | 770.85 | Aspiration of postnatal stomach contents without respiratory symptoms |
|                          | 770.86 | Aspiration of postnatal stomach contents with respiratory symptoms    |
| Neonatal thyroid disease | 243    | Congenital hypothyroidism                                             |
|                          | 775.3  | Neonatal thyrotoxicosis                                               |
|                          |        | All other codes 240-246                                               |

---

Web Table 2. Birth Weight Categories of Female and Male Infants by Gestational Age in the Consortium on Safe Labor, 2002-2008

| Gestational age<br>(weeks) | Singleton female infants |                  |                 | Singleton male infants |                  |                 |
|----------------------------|--------------------------|------------------|-----------------|------------------------|------------------|-----------------|
|                            | N                        | Birth weight (g) |                 | N                      | Birth weight (g) |                 |
|                            |                          | 10th percentile  | 90th percentile |                        | 10th percentile  | 90th percentile |
| 23                         | 156                      | 367              | 747             | 202                    | 455              | 810             |
| 24                         | 214                      | 423              | 820             | 229                    | 500              | 910             |
| 25                         | 190                      | 482.5            | 920.5           | 204                    | 590              | 1,094           |
| 26                         | 214                      | 590              | 1,050           | 232                    | 633              | 1,210           |
| 27                         | 224                      | 660              | 1,190           | 253                    | 751              | 1,327           |
| 28                         | 230                      | 785              | 1,540           | 300                    | 826              | 1,550           |
| 29                         | 321                      | 875              | 1,710           | 332                    | 915              | 1,714           |
| 30                         | 424                      | 1,049            | 1,880           | 393                    | 1,127            | 2,010           |
| 31                         | 445                      | 1,206            | 2,155           | 520                    | 1,246            | 2,132.5         |
| 32                         | 614                      | 1,380            | 2,400           | 731                    | 1,460            | 2,430           |
| 33                         | 865                      | 1,605            | 2,640           | 918                    | 1,635            | 2,776           |
| 34                         | 1,339                    | 1,758            | 2,795           | 1,535                  | 1,880            | 2,878           |
| 35                         | 2,152                    | 2,041            | 3,080           | 2,511                  | 2,102            | 3,171           |
| 36                         | 4,557                    | 2,238            | 3,310           | 4,970                  | 2,350            | 3,436           |
| 37                         | 9,959                    | 2,465            | 3,525           | 10,861                 | 2,570            | 3,650           |
| 38                         | 21,853                   | 2,690            | 3,714           | 23,287                 | 2,800            | 3,860           |
| 39                         | 33,516                   | 2,840            | 3,853           | 34,579                 | 2,950            | 4,002           |
| 40                         | 22,358                   | 2,936            | 3,962           | 22,328                 | 3,047            | 4,111           |
| 41                         | 7,480                    | 3,015            | 4,080           | 7,549                  | 3,140            | 4,228           |
| ≥42                        | 722                      | 2,994            | 4,095           | 780                    | 3,091.5          | 4,309.5         |

Web Table 3. Site-adjusted Odds Ratios of Singleton Neonatal Outcomes Associated with Maternal Thyroid Diseases in the Consortium on Safe Labor, 2002-2008

| Neonatal complications                             | Primary hypothyroidism<br>(N=3,183) |            | Iatrogenic hypothyroidism<br>(N=178) |            | Hyperthyroidism<br>(N=417) |            | Other or unspecific thyroid disease<br>(N=2,833) |            |
|----------------------------------------------------|-------------------------------------|------------|--------------------------------------|------------|----------------------------|------------|--------------------------------------------------|------------|
|                                                    | OR <sup>a</sup>                     | 95% CI     | OR                                   | 95% CI     | OR                         | 95% CI     | OR                                               | 95% CI     |
| Perinatal mortality                                | 0.90                                | 0.55, 1.48 | 1.05                                 | 0.15, 7.31 | 1.91                       | 0.78, 4.69 | 1.15                                             | 0.73, 1.82 |
| Neonatal resuscitation                             | 1.06                                | 0.97, 1.17 | 1.45                                 | 1.00, 2.12 | 1.44                       | 1.13, 1.83 | 0.98                                             | 0.89, 1.07 |
| Level of resuscitation CPAP or higher <sup>b</sup> | 1.03                                | 0.81, 1.31 | 1.52                                 | 0.65, 3.54 | 1.78                       | 0.99, 3.20 | 0.97                                             | 0.72, 1.31 |
| NICU admission                                     | 1.21                                | 1.09, 1.35 | 1.74                                 | 1.18, 2.55 | 1.78                       | 1.40, 2.26 | 1.13                                             | 1.01, 1.27 |
| Respiratory distress syndrome                      | 1.30                                | 1.08, 1.55 | 1.9                                  | 1.03, 3.51 | 1.94                       | 1.32, 2.85 | 1.20                                             | 0.99, 1.46 |
| Apnea <sup>c</sup>                                 | 1.37                                | 1.10, 1.69 | 1.76                                 | 0.80, 3.86 | 2.13                       | 1.39, 3.25 | 1.44                                             | 1.12, 1.85 |
| Transient tachypnea                                | 1.34                                | 1.13, 1.58 | 1.48                                 | 0.75, 2.91 | 1.71                       | 1.16, 2.53 | 1.01                                             | 0.81, 1.24 |
| Sepsis                                             | 1.27                                | 1.04, 1.56 | 2.71                                 | 1.49, 4.93 | 1.7                        | 1.10, 2.62 | 1.17                                             | 0.93, 1.47 |
| Anemia                                             | 1.26                                | 0.98, 1.61 | 2.82                                 | 1.41, 5.65 | 1.72                       | 1.04, 2.85 | 1.20                                             | 0.91, 1.58 |

Abbreviation: OR, odds ratio; CI, confidence interval; aOR, adjusted odds ratio; CPAP, continuous positive airway pressure; NICU, neonatal intensive care unit.

<sup>a</sup>ORs are obtained from multivariate logistic regression with generalized estimating equations to account for correlated data. All results are adjusted for site.

<sup>b</sup>Level of resuscitation is missing for 498 infants with documented need of resuscitation. <sup>c</sup>Apnea is missing all observations from one study site (N=20596).

Web Table 4. Site-Adjusted Odds Ratios of Rare Neonatal Outcomes of Pregnancies Associated With Maternal Thyroid Diseases in the Consortium on Safe Labor, 2002-2008

| Rare neonatal complications              | Hypothyroidism<br>(N=3361) |            | Hyperthyroidism<br>(N=417) |            | Other or unspecified<br>thyroid disease<br>(N=2833) |            |
|------------------------------------------|----------------------------|------------|----------------------------|------------|-----------------------------------------------------|------------|
|                                          | OR <sup>a</sup>            | 95% CI     | OR                         | 95% CI     | OR                                                  | 95% CI     |
| Any peri- or intraventricular hemorrhage | 1.34                       | 0.91, 1.99 | 1.72                       | 0.71, 4.17 | 1.02                                                | 0.60, 1.74 |
| Intracerebral hemorrhage                 | 1.29                       | 0.61, 2.73 | Not applicable             |            | 0.91                                                | 0.41, 2.03 |
| Seizure                                  | 0.68                       | 0.25, 1.84 | Not applicable             |            | 0.75                                                | 0.28, 2.00 |
| Oliguria                                 | 0.80                       | 0.11, 5.81 | Not applicable             |            | 1.37                                                | 0.19, 10.1 |
| Cardiomyopathy                           | 3.74                       | 0.90, 15.6 | 11.5                       | 1.48, 89.7 | 2.30                                                | 1.13, 4.71 |
| Necrotizing enterocolitis                | 1.01                       | 0.45, 2.27 | 2.29                       | 0.56, 9.30 | 1.48                                                | 0.73, 3.00 |
| Retinopathy of prematurity               | 1.26                       | 0.77, 2.08 | 2.61                       | 1.16, 5.87 | 1.65                                                | 0.97, 2.82 |
| Asphyxia                                 | 0.93                       | 0.46, 1.88 | 2.53                       | 0.82, 7.87 | 0.93                                                | 0.44, 1.96 |
| Aspiration with or without pneumonia     | 0.57                       | 0.30, 1.06 | 0.91                       | 0.23, 3.67 | 1.26                                                | 0.80, 1.99 |
| Infective pneumonia                      | 0.71                       | 0.45, 1.14 | 1.30                       | 0.48, 3.50 | 1.35                                                | 0.90, 2.02 |
| Any neonatal thyroid disease             | 3.32                       | 1.02, 10.8 | 50.8                       | 22.5, 115  | 2.18                                                | 0.29, 16.5 |



---

Abbreviation: OR, odds ratio; CI, confidence interval; aOR, adjusted odds ratio. <sup>a</sup>ORs are obtained from multivariate logistic regression with generalized estimating equations to account for correlated data. All results are adjusted for site.

Web Table 5. The Site-Adjusted Odds Ratios of the Indicators of Fetal Growth by Maternal Thyroid Diseases in the Consortium on Safe Labor (2002-2008), Stratified by Race/Ethnicity

|                                                     | <b>No thyroid disease<br/>(N=216901)</b> | <b>Hypothyroidism<br/>(N=3361)</b> | <b>Hyperthyroidism<br/>(N=417)</b> |                | <b>Other or unspecified thyroid disease<br/>(N=2833)</b> |      |            |
|-----------------------------------------------------|------------------------------------------|------------------------------------|------------------------------------|----------------|----------------------------------------------------------|------|------------|
| <b>Non-Hispanic White</b>                           |                                          |                                    |                                    |                |                                                          |      |            |
| Term birth weight <2500 g, OR 95% CI <sup>a,b</sup> | 1.00                                     | 1.01                               | 0.75, 1.37                         | 1.76           | 0.77, 4.05                                               | 1.00 | 0.75, 1.35 |
| Term birth weight ≥4000 g, OR 95% CI <sup>a,b</sup> | 1.00                                     | 1.06                               | 0.92, 1.21                         | 0.87           | 0.50, 1.50                                               | 1.11 | 0.95, 1.31 |
| SGA, OR 95% CI <sup>a,b</sup>                       | 1.00                                     | 0.93                               | 0.79, 1.09                         | 1.30           | 0.80, 2.12                                               | 0.95 | 0.80, 1.13 |
| LGA, OR 95% CI <sup>a,b</sup>                       | 1.00                                     | 1.30                               | 1.16, 1.45                         | 1.02           | 0.66, 1.58                                               | 1.32 | 1.16, 1.51 |
| <b>Non, Hispanic Black</b>                          |                                          |                                    |                                    |                |                                                          |      |            |
| Term birth weight <2500 g, OR 95% CI <sup>a,b</sup> | 1.00                                     | 1.34                               | 0.70, 2.57                         | 2.38           | 1.24, 4.54                                               | 0.30 | 0.10, 0.93 |
| Term birth weight ≥4000 g, OR 95% CI <sup>a,b</sup> | 1.00                                     | 0.48                               | 0.21, 1.09                         | 0.51           | 0.17, 1.59                                               | 0.75 | 0.41, 1.38 |
| SGA, OR 95% CI <sup>a,b</sup>                       | 1.00                                     | 1.38                               | 0.98, 1.93                         | 0.92           | 0.56, 1.51                                               | 0.99 | 0.71, 1.38 |
| LGA, OR 95% CI <sup>a,b</sup>                       | 1.00                                     | 1.05                               | 0.64, 1.73                         | 1.41           | 0.81, 2.45                                               | 0.96 | 0.59, 1.56 |
| <b>Hispanic</b>                                     |                                          |                                    |                                    |                |                                                          |      |            |
| Term birth weight <2500 g, OR 95% CI <sup>a,b</sup> | 1.00                                     | 1.65                               | 0.86, 3.16                         | 1.14           | 0.15, 8.85                                               | 0.72 | 0.30, 1.78 |
| Term birth weight ≥4000 g, OR 95% CI <sup>a,b</sup> | 1.00                                     | 1.25                               | 0.83, 1.90                         | Not applicable |                                                          | 0.95 | 0.64, 1.41 |
| SGA, OR 95% CI <sup>a,b</sup>                       | 1.00                                     | 1.09                               | 0.75, 1.59                         | 2.12           | 1.02, 4.43                                               | 0.77 | 0.50, 1.19 |

|                               |      |      |            |      |            |      |            |
|-------------------------------|------|------|------------|------|------------|------|------------|
| LGA, OR 95% CI <sup>a,b</sup> | 1.00 | 1.66 | 1.20, 2.30 | 1.03 | 0.38, 2.81 | 1.62 | 1.20, 2.18 |
|-------------------------------|------|------|------------|------|------------|------|------------|

---

Abbreviation: OR, odds ratio; CI, confidence interval; SGA, small for gestational age; LGA, large for gestational age. <sup>a</sup>Birth weight was missing or improbable for 2649 (1.2%) observations and excluded from all analyses. N=41,990 preterm births are excluded from the analysis of term birth weight. All babies with unknown or ambiguous sex (N=316) are excluded. <sup>b</sup>ORs are obtained from multivariate logistic regression with generalized estimating equations to account for correlated data. All results are adjusted for site.
